# Supplementary material for: In SilicoApproach towards Designing Virtual Oligopeptides for HRSV
Source: Hindawi journal article supplement (doi:10.1155/2014/613293), 2014-01-01
Supplement: f1 [file 613293.f1.pdf]

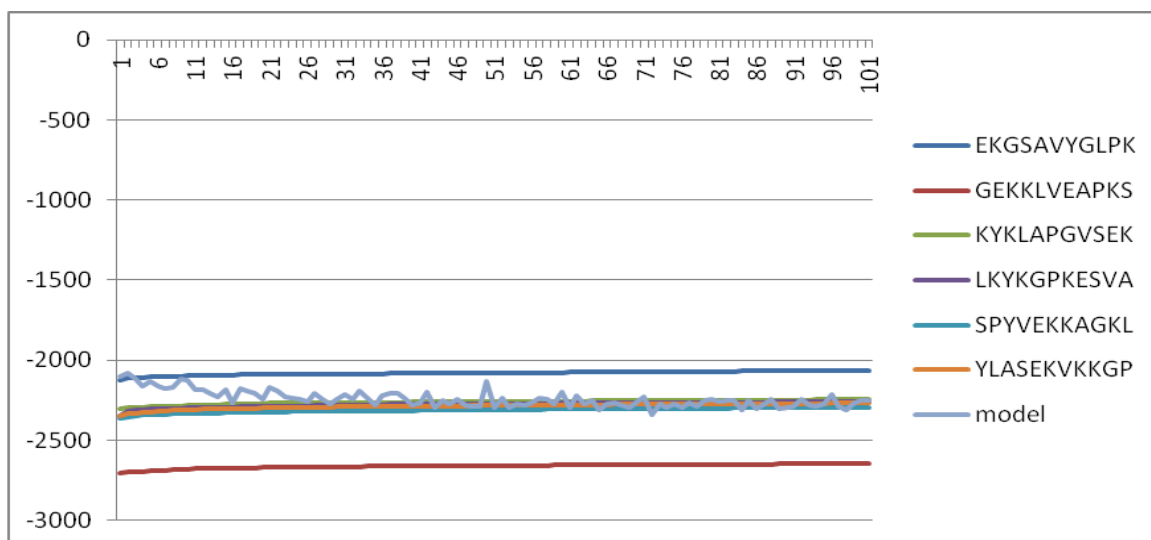

(A)

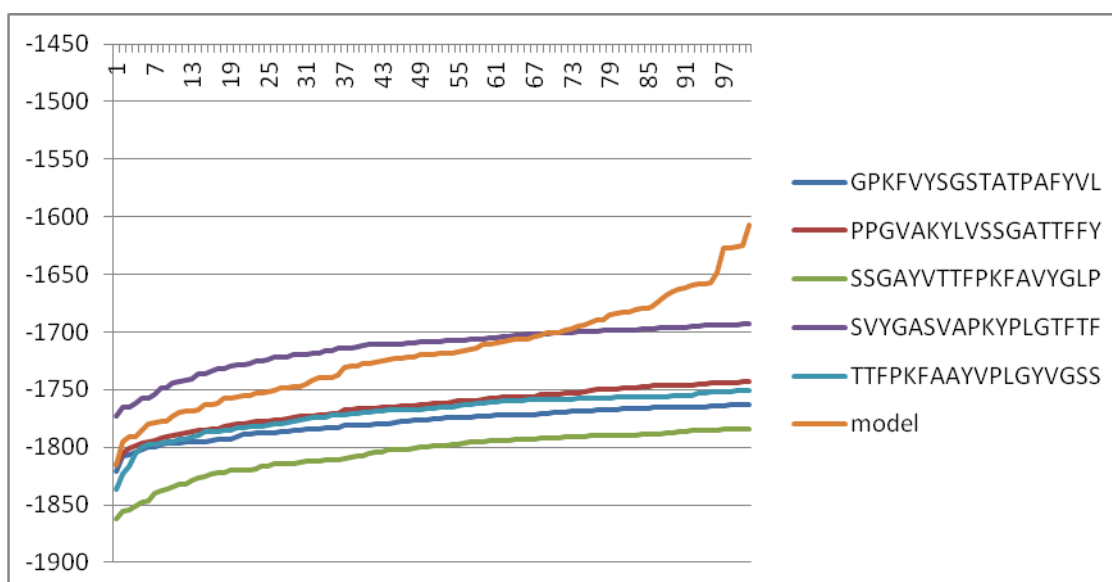

(B)

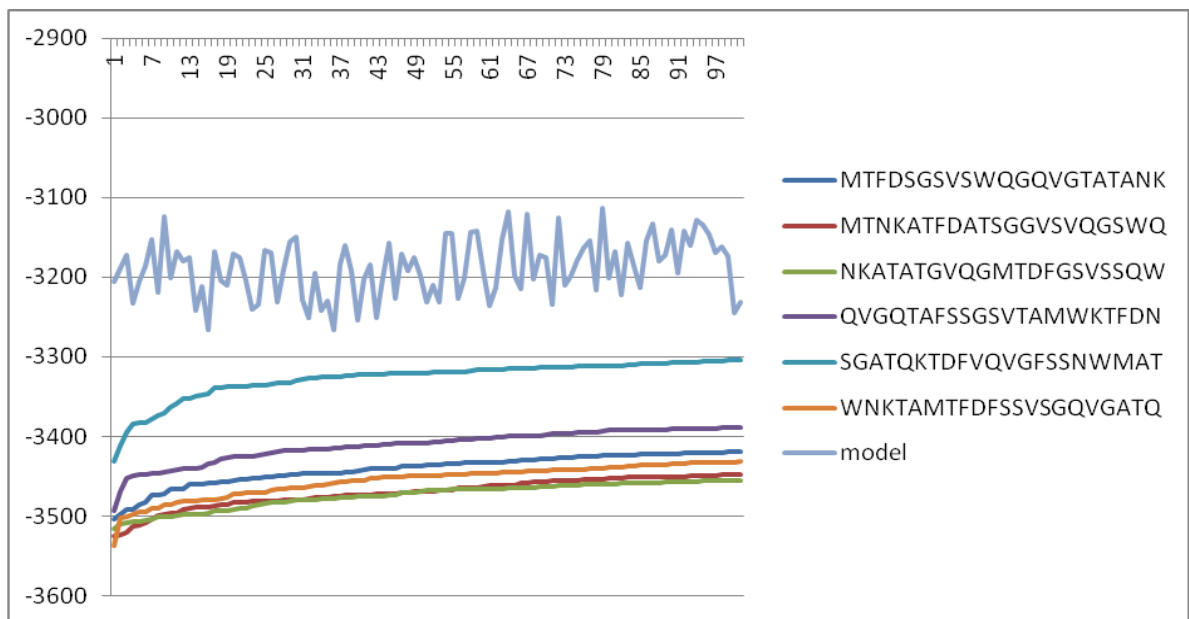

(C)

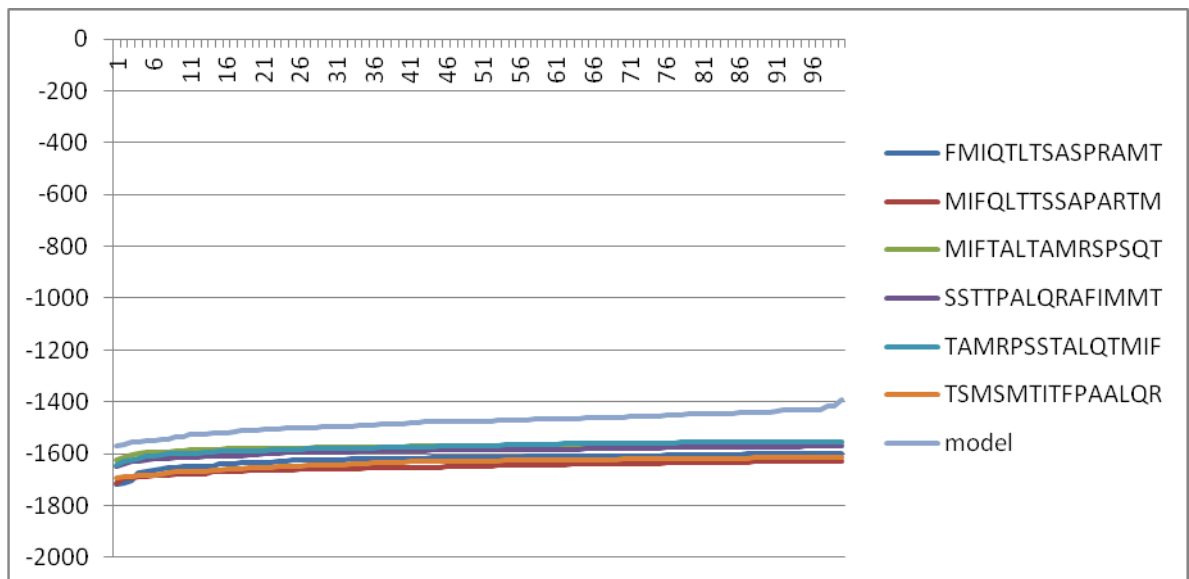

(D)

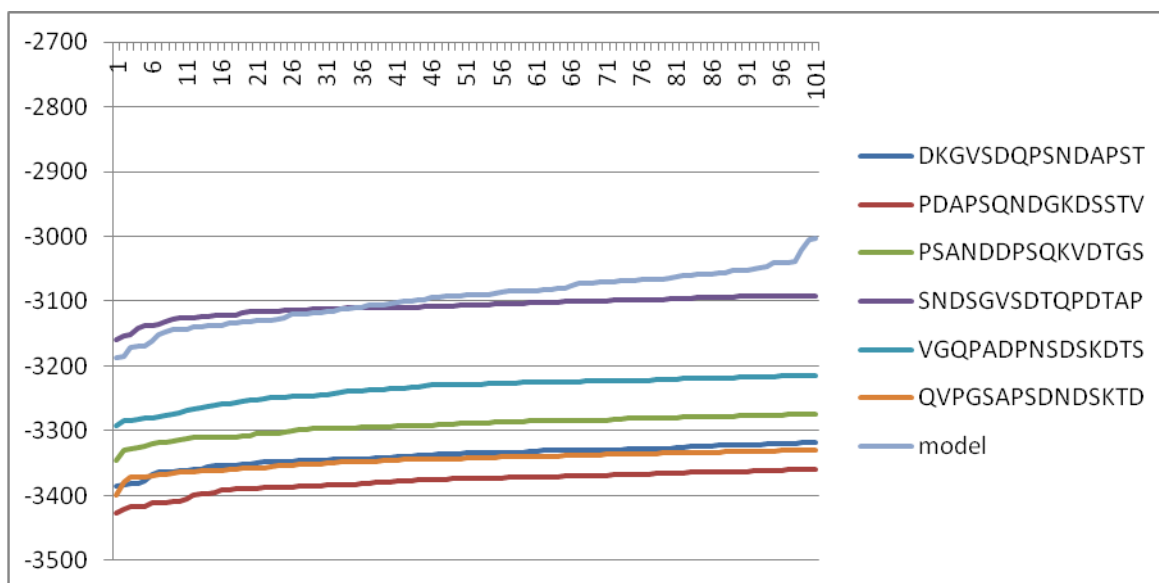

(E)

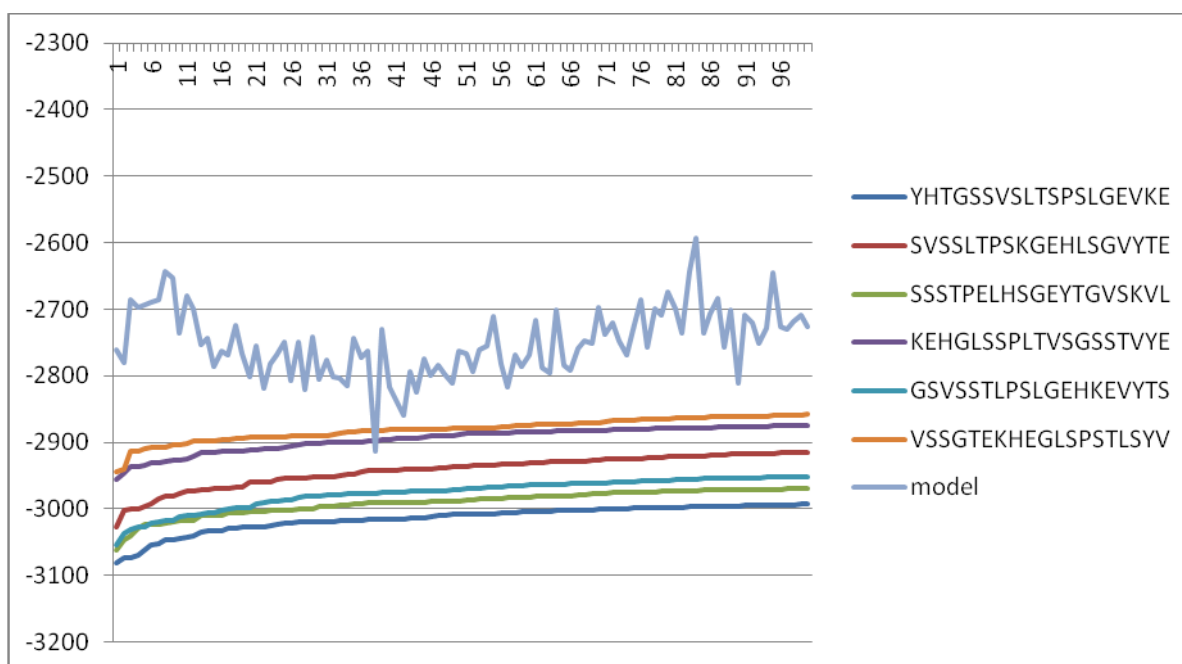

(F)

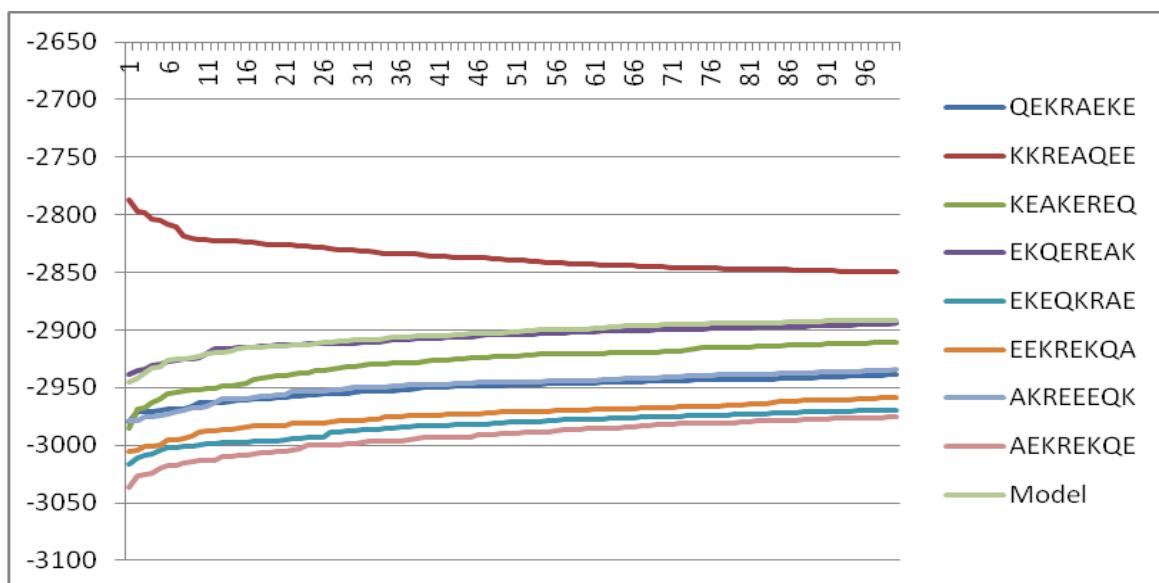

(G)

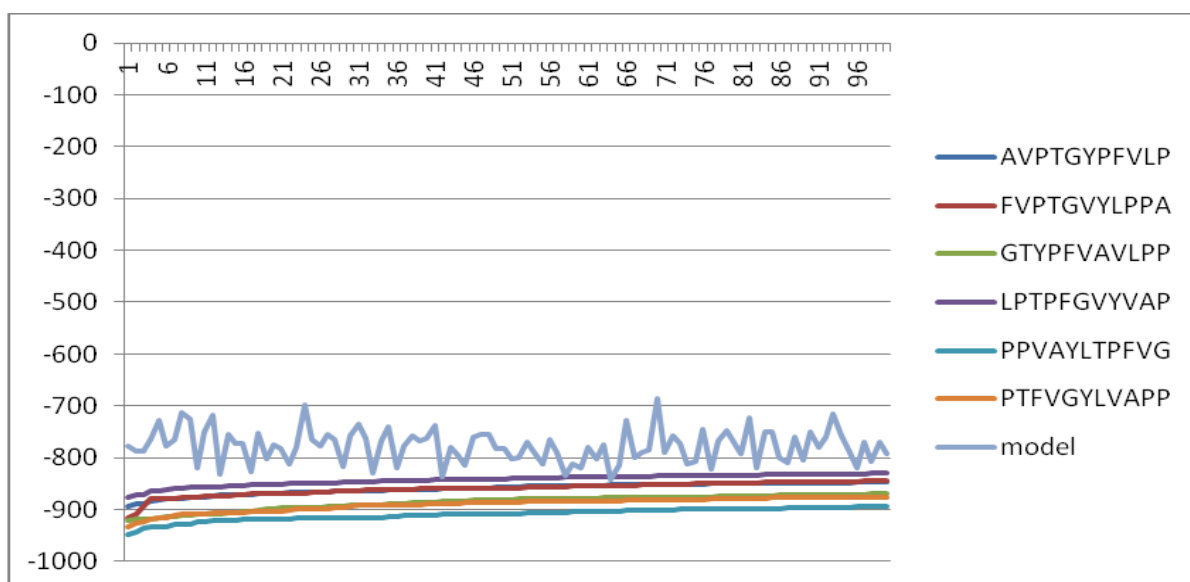

(H)

**Graphical representation of potential energies of designed oligopeptides and original oligopeptide represented as model in each graph**

- (a) PGKYKLAVSEK (b) PGKFYVSSGATTFFPAVYL  
 (c) QVGFSSTAMWNKTFDVSGATQ (d) QTAMRMIFTALTSPS  
 (e) SGVQPDAPSNDKDT (f) PSTLSVSSGTVYEKHEGLS  
 (g) KREAKQEE (h) PGPTVFPAVLY

Peptides are differentially coloured and represented at the right side of the graph which helps in identifying the most stable oligopeptide in terms of their potential energy.
